# Supplementary material for: Multidimensional Benefits of Improved Sanitation: Evaluating ‘PEE POWER®’ in Kisoro, Uganda
Source: MDPI journal article supplement (doi:10.3390/ijerph17072175), 2020-03-25
Supplement: s1 [file s1]

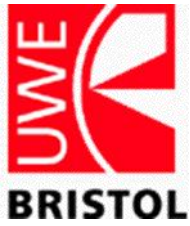

- |                                                                          |                              |
|--------------------------------------------------------------------------|------------------------------|
| 1. Are you male or female?                                               | I am male / I am female      |
| 2. Are you under 16 years old or over 16 years old?                      | I am under 16 / I am over 16 |
| 3. Do you like the toilets in your village?                              | Yes / No                     |
| 4. Do you have enough toilets in your village?                           | Yes / No                     |
| 5. Are the toilets in your village safe?                                 | Yes / No                     |
| 6. Do you fear for your family member's safety when they use the toilet? | Yes / No                     |
| 7. Are the school toilets safe to use at night?                          | Yes / No                     |
| 8. Does your family have their own toilet?                               | Yes / No                     |
| 9. Has a women been attacked when going to the toilet in your village?   | Yes / No                     |
