# Supplementary material for: Multidimensional Benefits of Improved Sanitation: Evaluating ‘PEE POWER®’ in Kisoro, Uganda
Source: MDPI journal article supplement (doi:10.3390/ijerph17072175), 2020-03-25
Supplement: s1 [file s1]

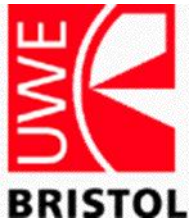

1. Are you Male or Female? I am male / I am female
2. Are you under 16 years old or over 16 years old? I am under 16 / I am over 16
3. Do you use the Pee-power toilets? Yes / No
4. Are Pee-power toilets are easy to use? Yes / No
5. Do Pee-power toilets make you feel safer at night? Yes / No
6. Do you like the idea of using urine to make electricity? Yes / No
7. Do you prefer to use the Pee-power toilets instead of the other toilets? Yes / No
8. Is it safe to go to the toilet alone at night? Yes / No
9. Would Pee-power toilets make women safer in your village? Yes / No
