# Supplementary material for: Multidimensional Benefits of Improved Sanitation: Evaluating ‘PEE POWER®’ in Kisoro, Uganda
Source: MDPI journal article supplement (doi:10.3390/ijerph17072175), 2020-03-25
Supplement: s1 [file s1]

### 1. Basic Information

- |                                                     |                              |
|-----------------------------------------------------|------------------------------|
| 1. Are you male or female?                          | I am male / I am female      |
| 2. Are you under 16 years old or over 16 years old? | I am under 16 / I am over 16 |

### 2. Sanitation Experiences

- |                                                                          |          |
|--------------------------------------------------------------------------|----------|
| 3. Do you like the toilets in your town/village?                         | Yes / No |
| 4. Do you have enough toilets in your town/village?                      | Yes / No |
| 5. Does your family have their own toilet at home?                       | Yes / No |
| 6. Are the toilets in your town/village safe to use?                     | Yes / No |
| 7. Do you fear for your family members' safety when they use the toilet? | Yes / No |
| 8. Have women been attacked when going to the toilet in your village?    | Yes / No |
| 9. Are the school toilets safe to use at night?                          | Yes / No |

### 3. Experiences with "Pee Power"

- |                                                                              |          |
|------------------------------------------------------------------------------|----------|
| 10. Do you use the Pee Power toilets?                                        | Yes / No |
| 11. Are Pee Power toilets easy to use?                                       | Yes / No |
| 12. Do Pee Power toilets make you feel safer at night?                       | Yes / No |
| 13. Do you like the idea of using urine to make electricity?                 | Yes / No |
| 14. Do you prefer to use the Pee Power toilets instead of the other toilets? | Yes / No |
| 15. Would Pee Power toilets make women safer in your town/village?           | Yes / No |

### 4. Looking forward

- |                                                                                       |          |
|---------------------------------------------------------------------------------------|----------|
| 16. Would you like to see more Pee Power toilets in your community?                   | Yes / No |
| 17. What else would you like to tell us about your experience with Pee Power toilets? |          |

---



---



---
